# Supplementary material for: Genetic Variability in Markers of HLA-C Expression in Two Diverse South African Populations
Source: PubMed Central journal article supplement (PMC3702582; doi:10.1371/journal.pone.0067780), 2013-07-05
Supplement: pone.0067780.s001.pdf [file pone.0067780.s001.pdf]

**Table S1: HLA-C allele frequencies in the Black and Caucasian population groups**

| <i>HLA-C</i> Allele | Black Individuals |           | Caucasian Individuals |           |
|---------------------|-------------------|-----------|-----------------------|-----------|
|                     | n                 | Frequency | n                     | Frequency |
| 01:02               | 0                 | -         | 4                     | 0.021     |
| 02:02               | 5                 | 0.015     | 14                    | 0.072     |
| 02:05               | 1                 | 0.003     | 1                     | 0.005     |
| 02:10               | 26                | 0.077     | 0                     | -         |
| 03:02               | 5                 | 0.015     | 0                     | -         |
| 03:03               | 1                 | 0.003     | 12                    | 0.062     |
| 03:04               | 15                | 0.045     | 11                    | 0.057     |
| 03:16               | 0                 | -         | 1                     | 0.005     |
| 04:01               | 42                | 0.125     | 17                    | 0.088     |
| 04:04               | 1                 | 0.003     | 0                     | -         |
| 04:08               | 0                 | -         | 1                     | 0.005     |
| 05:01               | 3                 | 0.009     | 10                    | 0.052     |
| 06:02               | 50                | 0.149     | 15                    | 0.077     |
| 06:06               | 1                 | 0.003     | 0                     | -         |
| 06:11               | 1                 | 0.003     | 1                     | 0.005     |
| 07:01               | 24                | 0.071     | 34                    | 0.175     |
| 07:02               | 21                | 0.063     | 28                    | 0.144     |
| 07:04               | 5                 | 0.015     | 2                     | 0.010     |
| 07:06               | 13                | 0.039     | 4                     | 0.021     |
| 07:11               | 1                 | 0.003     | 0                     | -         |
| 07:18               | 14                | 0.042     | 3                     | 0.016     |
| 08:01               | 1                 | 0.003     | 1                     | 0.005     |
| 08:02               | 5                 | 0.015     | 4                     | 0.021     |
| 08:04               | 10                | 0.030     | 2                     | 0.010     |
| 12:02               | 0                 | -         | 2                     | 0.010     |
| 12:03               | 5                 | 0.015     | 4                     | 0.021     |
| 14:02               | 2                 | 0.006     | 2                     | 0.010     |
| 15:02               | 2                 | 0.006     | 5                     | 0.026     |
| 15:05               | 3                 | 0.009     | 0                     | -         |
| 15:xx               | 2                 | 0.006     | 0                     | -         |
| 16:01               | 24                | 0.071     | 13                    | 0.067     |
| 16:02               | 0                 | -         | 2                     | 0.010     |
| 17:01               | 38                | 0.113     | 1                     | 0.005     |
| 18:01               | 5                 | 0.015     | 0                     | -         |
| 18:02               | 10                | 0.030     | 0                     | -         |
