# Supplementary material for: Genetic Variability in Markers of HLA-C Expression in Two Diverse South African Populations
Source: PubMed Central journal article supplement (PMC3702582; doi:10.1371/journal.pone.0067780), 2013-07-05
Supplement: pone.0067780.s002.pdf [file pone.0067780.s002.pdf]

**Table S2:** Polymorphic positions within the *HLA-C* 3' UTR

| Position | dbSNP ID    | Alleles | Minor Allele Frequency |                       | p-value |
|----------|-------------|---------|------------------------|-----------------------|---------|
|          |             |         | Black Individuals      | Caucasian Individuals |         |
| 46       | rs1049853   | C/T     | 0.067                  | 0.089                 | -       |
| 84       | rs1049724   | A/G     | 0.003                  | 0.000                 | -       |
| 92       | rs1049709   | A/G     | 0.052                  | 0.177                 | <0.001  |
| 93       | rs1065711   | C/T     | 0.061                  | 0.151                 | 0.001   |
| 101      | rs3176007   | C/T     | 0.046                  | 0.083                 | -       |
| 110      | rs41289069  | C/T     | 0.135                  | 0.047                 | 0.001   |
| 125      | rs1049668   | A/G     | 0.117                  | 0.005                 | <0.001  |
| 133      | rs1049663   | G/T     | 0.117                  | 0.005                 | <0.001  |
| 138      | rs1049650   | C/G     | 0.065                  | 0.094                 | -       |
| 146      | rs116229144 | C/T     | 0.117                  | 0.005                 | <0.001  |
| 179      | rs1049579   | C/T     | 0.117                  | 0.005                 | <0.001  |
| 224      | rs1094      | A/G     | 0.379                  | 0.401                 | -       |
| 230      | rs35877659  | G/-     | 0.379                  | 0.401                 | -       |
| 256      | rs1130592   | A/C     | 0.256                  | 0.373                 | -       |
| 259      | rs3207555   | C/T     | 0.307                  | 0.260                 | -       |
| 261      | rs3207561   | C/T     | 0.307                  | 0.260                 | -       |
| 263      | rs67384697  | G/-     | 0.354                  | 0.313                 | -       |
| 266      | rs1130586   | C/T     | 0.351                  | 0.313                 | -       |
| 267      | rs1130580   | A/G     | 0.253                  | 0.286                 | -       |
| 278      | rs1130576   | A/G     | 0.122                  | 0.005                 | <0.001  |
| 285      | rs60637457  | ACTT/-  | 0.003                  | 0.000                 | -       |
| 294      | rs1130559   | A/C     | 0.351                  | 0.313                 | -       |
| 299      | rs1130558   | A/G     | 0.351                  | 0.313                 | -       |
| 300      | rs1130554   | A/T     | 0.351                  | 0.313                 | -       |
| 303      | rs1130552   | A/G     | 0.065                  | 0.135                 | 0.006   |
| 307      | rs1071643   | C/G/T   | 0.003                  | 0.010                 | -       |
| 324      | rs1130538   | G/T     | 0.393                  | 0.401                 | -       |
| 345      | rs116302614 | A/G     | 0.351                  | 0.313                 | -       |
| 346      | rs115906458 | A/G     | 0.351                  | 0.313                 | -       |
| 347      | rs3189472   | C/G     | 0.393                  | 0.401                 | -       |
| 356      | rs115510686 | A/G     | 0.122                  | 0.005                 | <0.001  |
| 375      | rs114027487 | C/T     | 0.074                  | 0.078                 | -       |
| 379      | rs1049281   | A/G     | 0.393                  | 0.401                 | -       |
